# Supplementary material for: Lost in translation: egg transcriptome reveals molecular signature to predict developmental success and novel maternal-effect genes
Source: bioRxiv or medRxiv preprint supplement (doi:10.1101/286815), 2018-03-23

Supplemental Figure 1: Tissue localization of *fam105ba* and *slc29a1a* transcripts by RNA-seq.

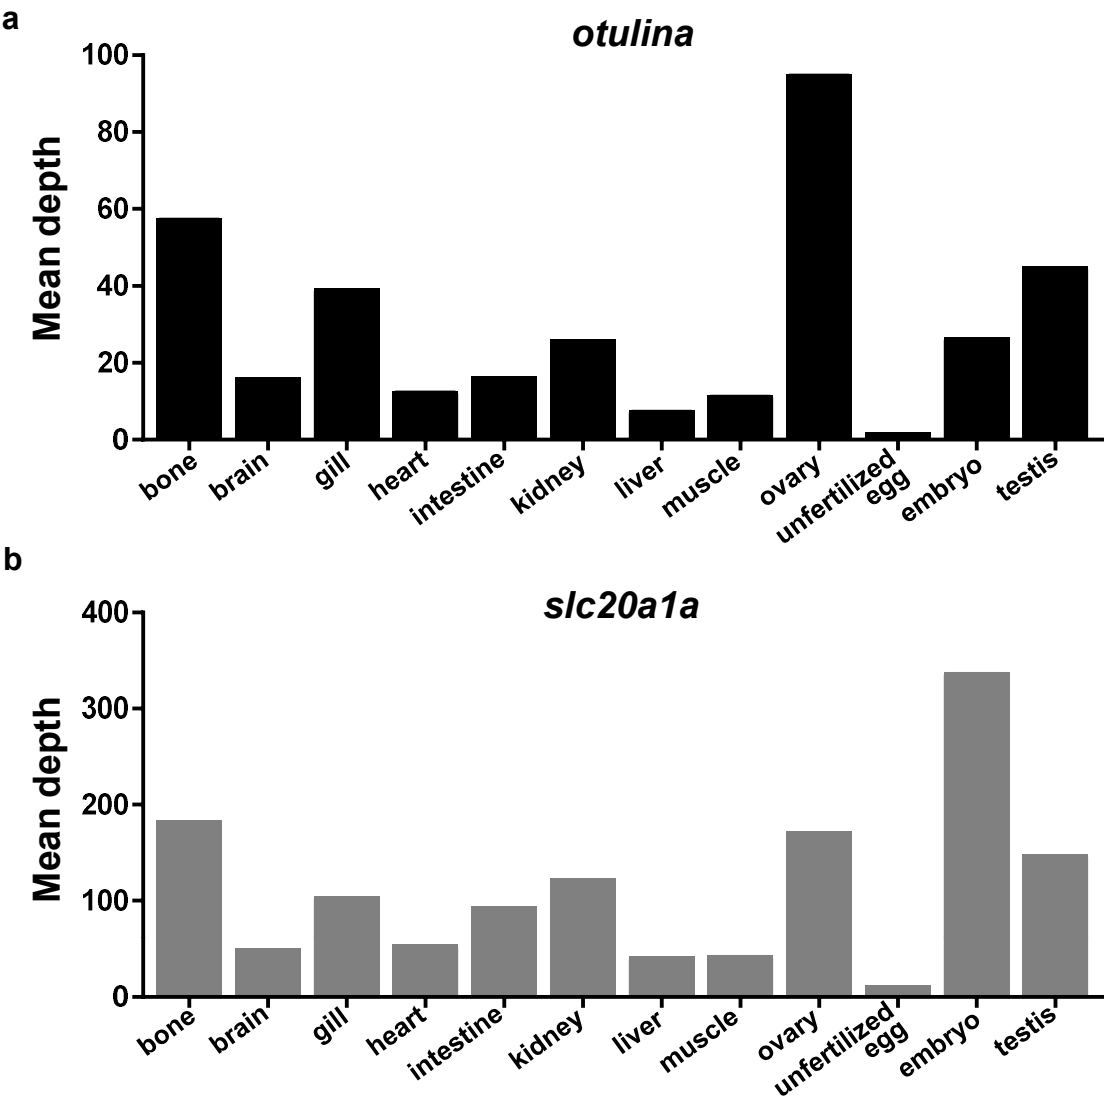

Supplement: Supplementary file [file 286815-7.pdf]
